# Supplementary figures and images for: Enterochromaffin 5-HT cells – A major target for GLP-1 and gut microbial metabolites
Source: PubMed Central journal article supplement — Mol Metab. 2018 Mar 10;11:70–83. doi: 10.1016/j.molmet.2018.03.004 (PMC6001397; doi:10.1016/j.molmet.2018.03.004), 2018-03-10

# Supplementary figure 1

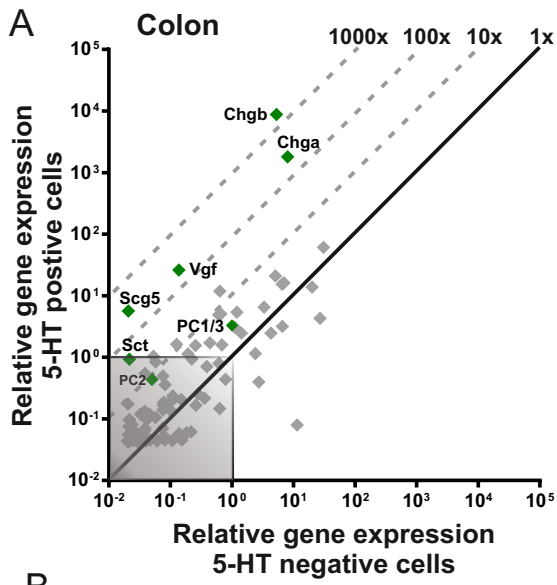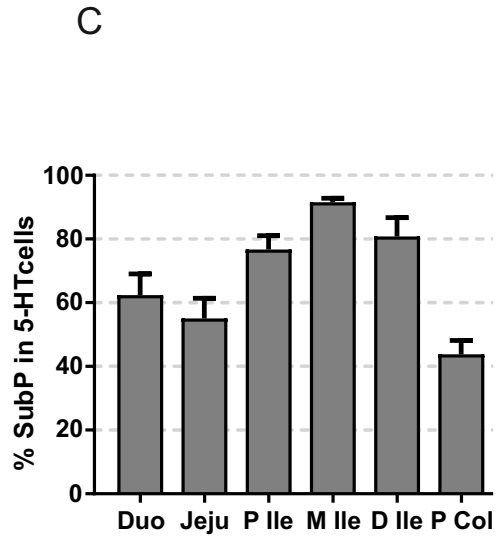

**B**

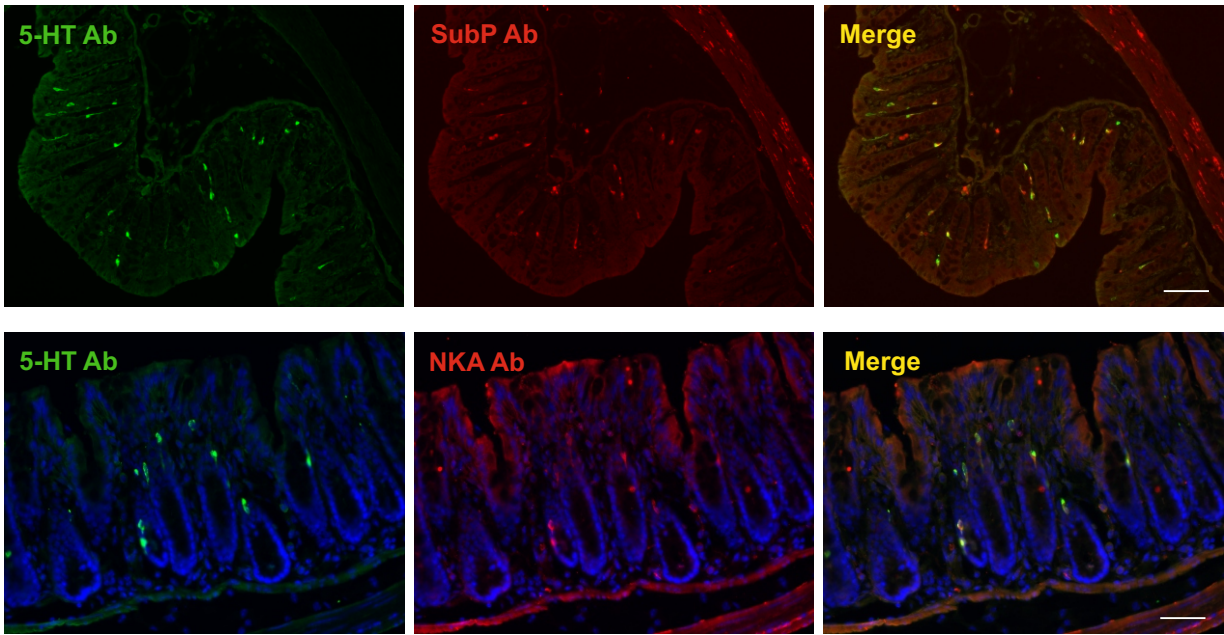

Supplement: mmc2.pdf [file mmc2.pdf]

## Supplementary figure 2

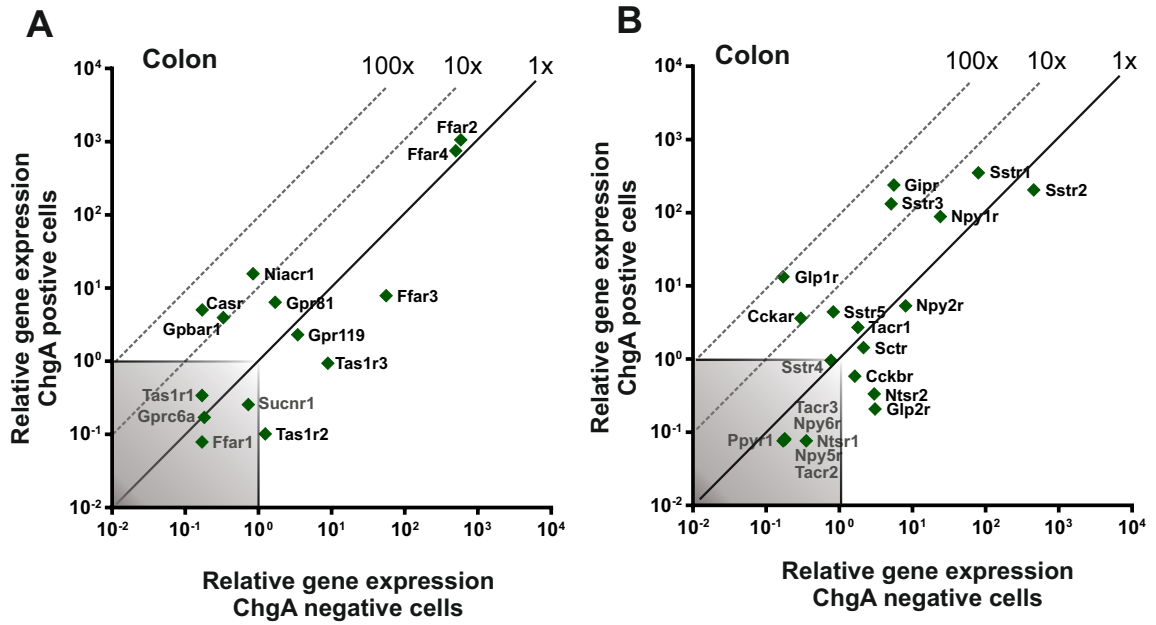

Supplement: mmc3.pdf [file mmc3.pdf]

Supplementary figure 3

Duodenum

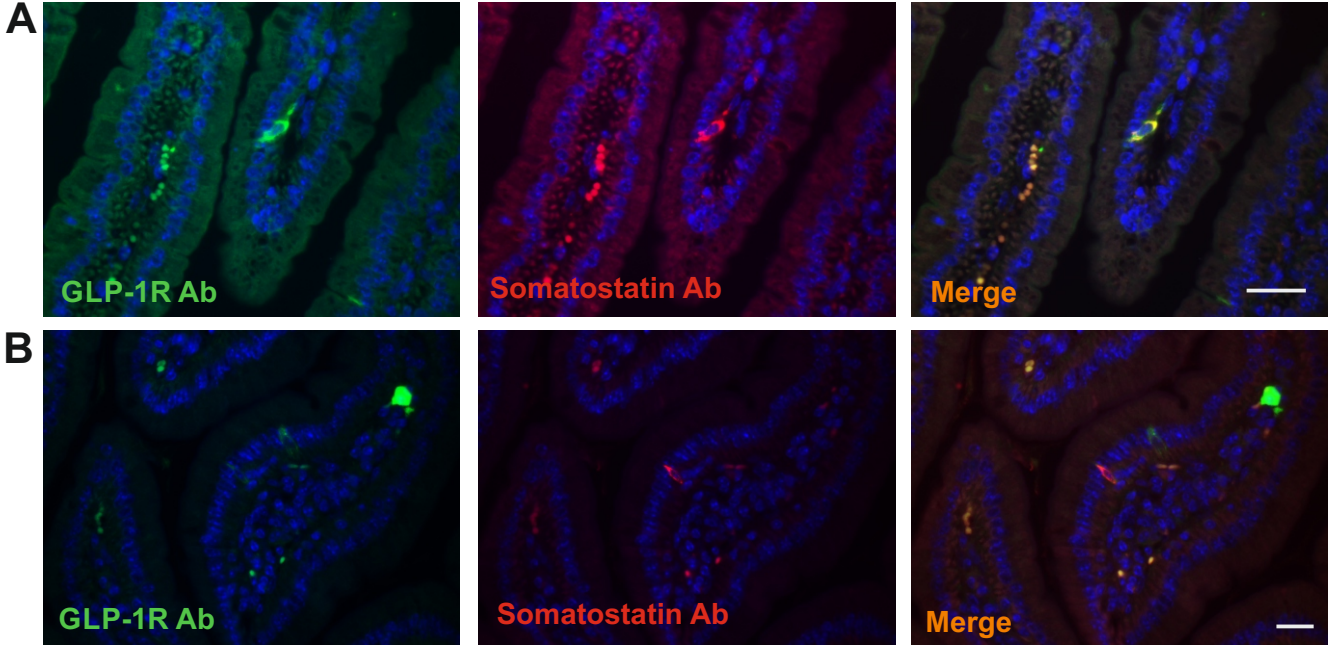

Supplement: mmc4.pdf [file mmc4.pdf]

Supplementary figure 4

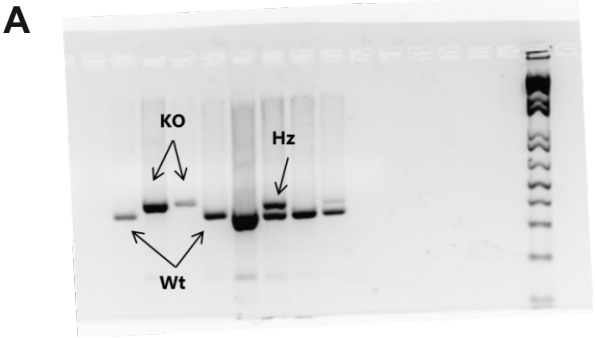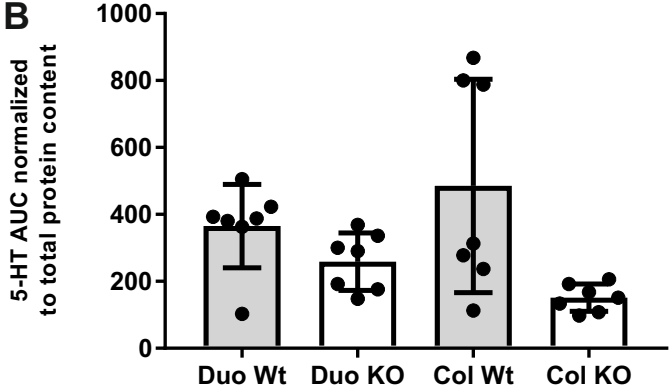

**C** TPH1KO +/+ (wt)

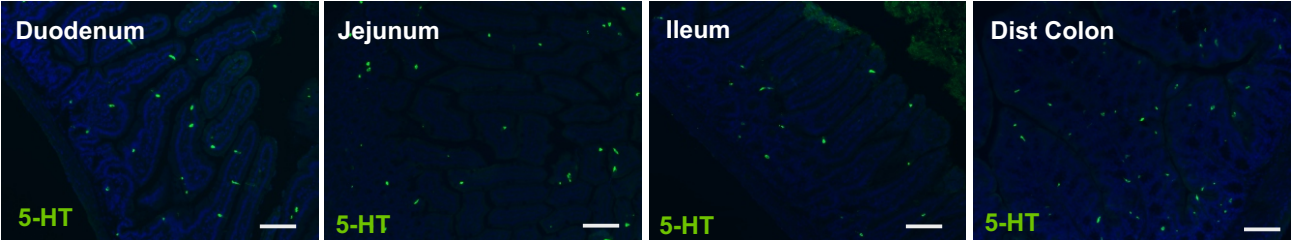

TPH1KO -/-

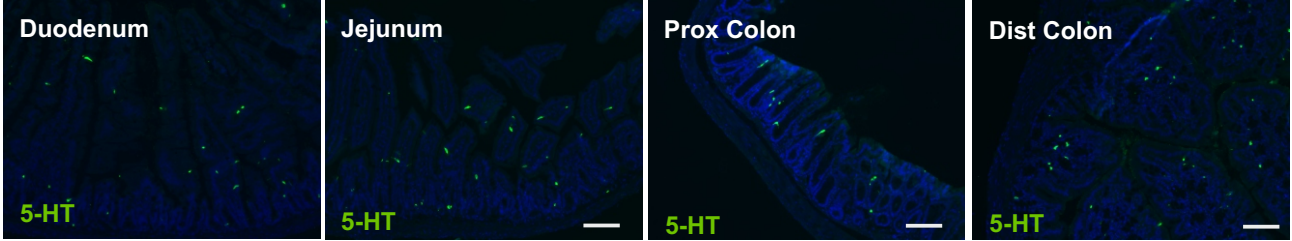

Supplement: mmc5.pdf [file mmc5.pdf]
